# Supplementary figures and images for: Sequence Length of HIV-1 Subtype B Increases Over Time: Analyzing a Cohort of Patients with Hemophilia Over 30 Years
Source: Preprints.org preprint supplement (doi:10.20944/preprints202102.0575.v1), 2021-02-25

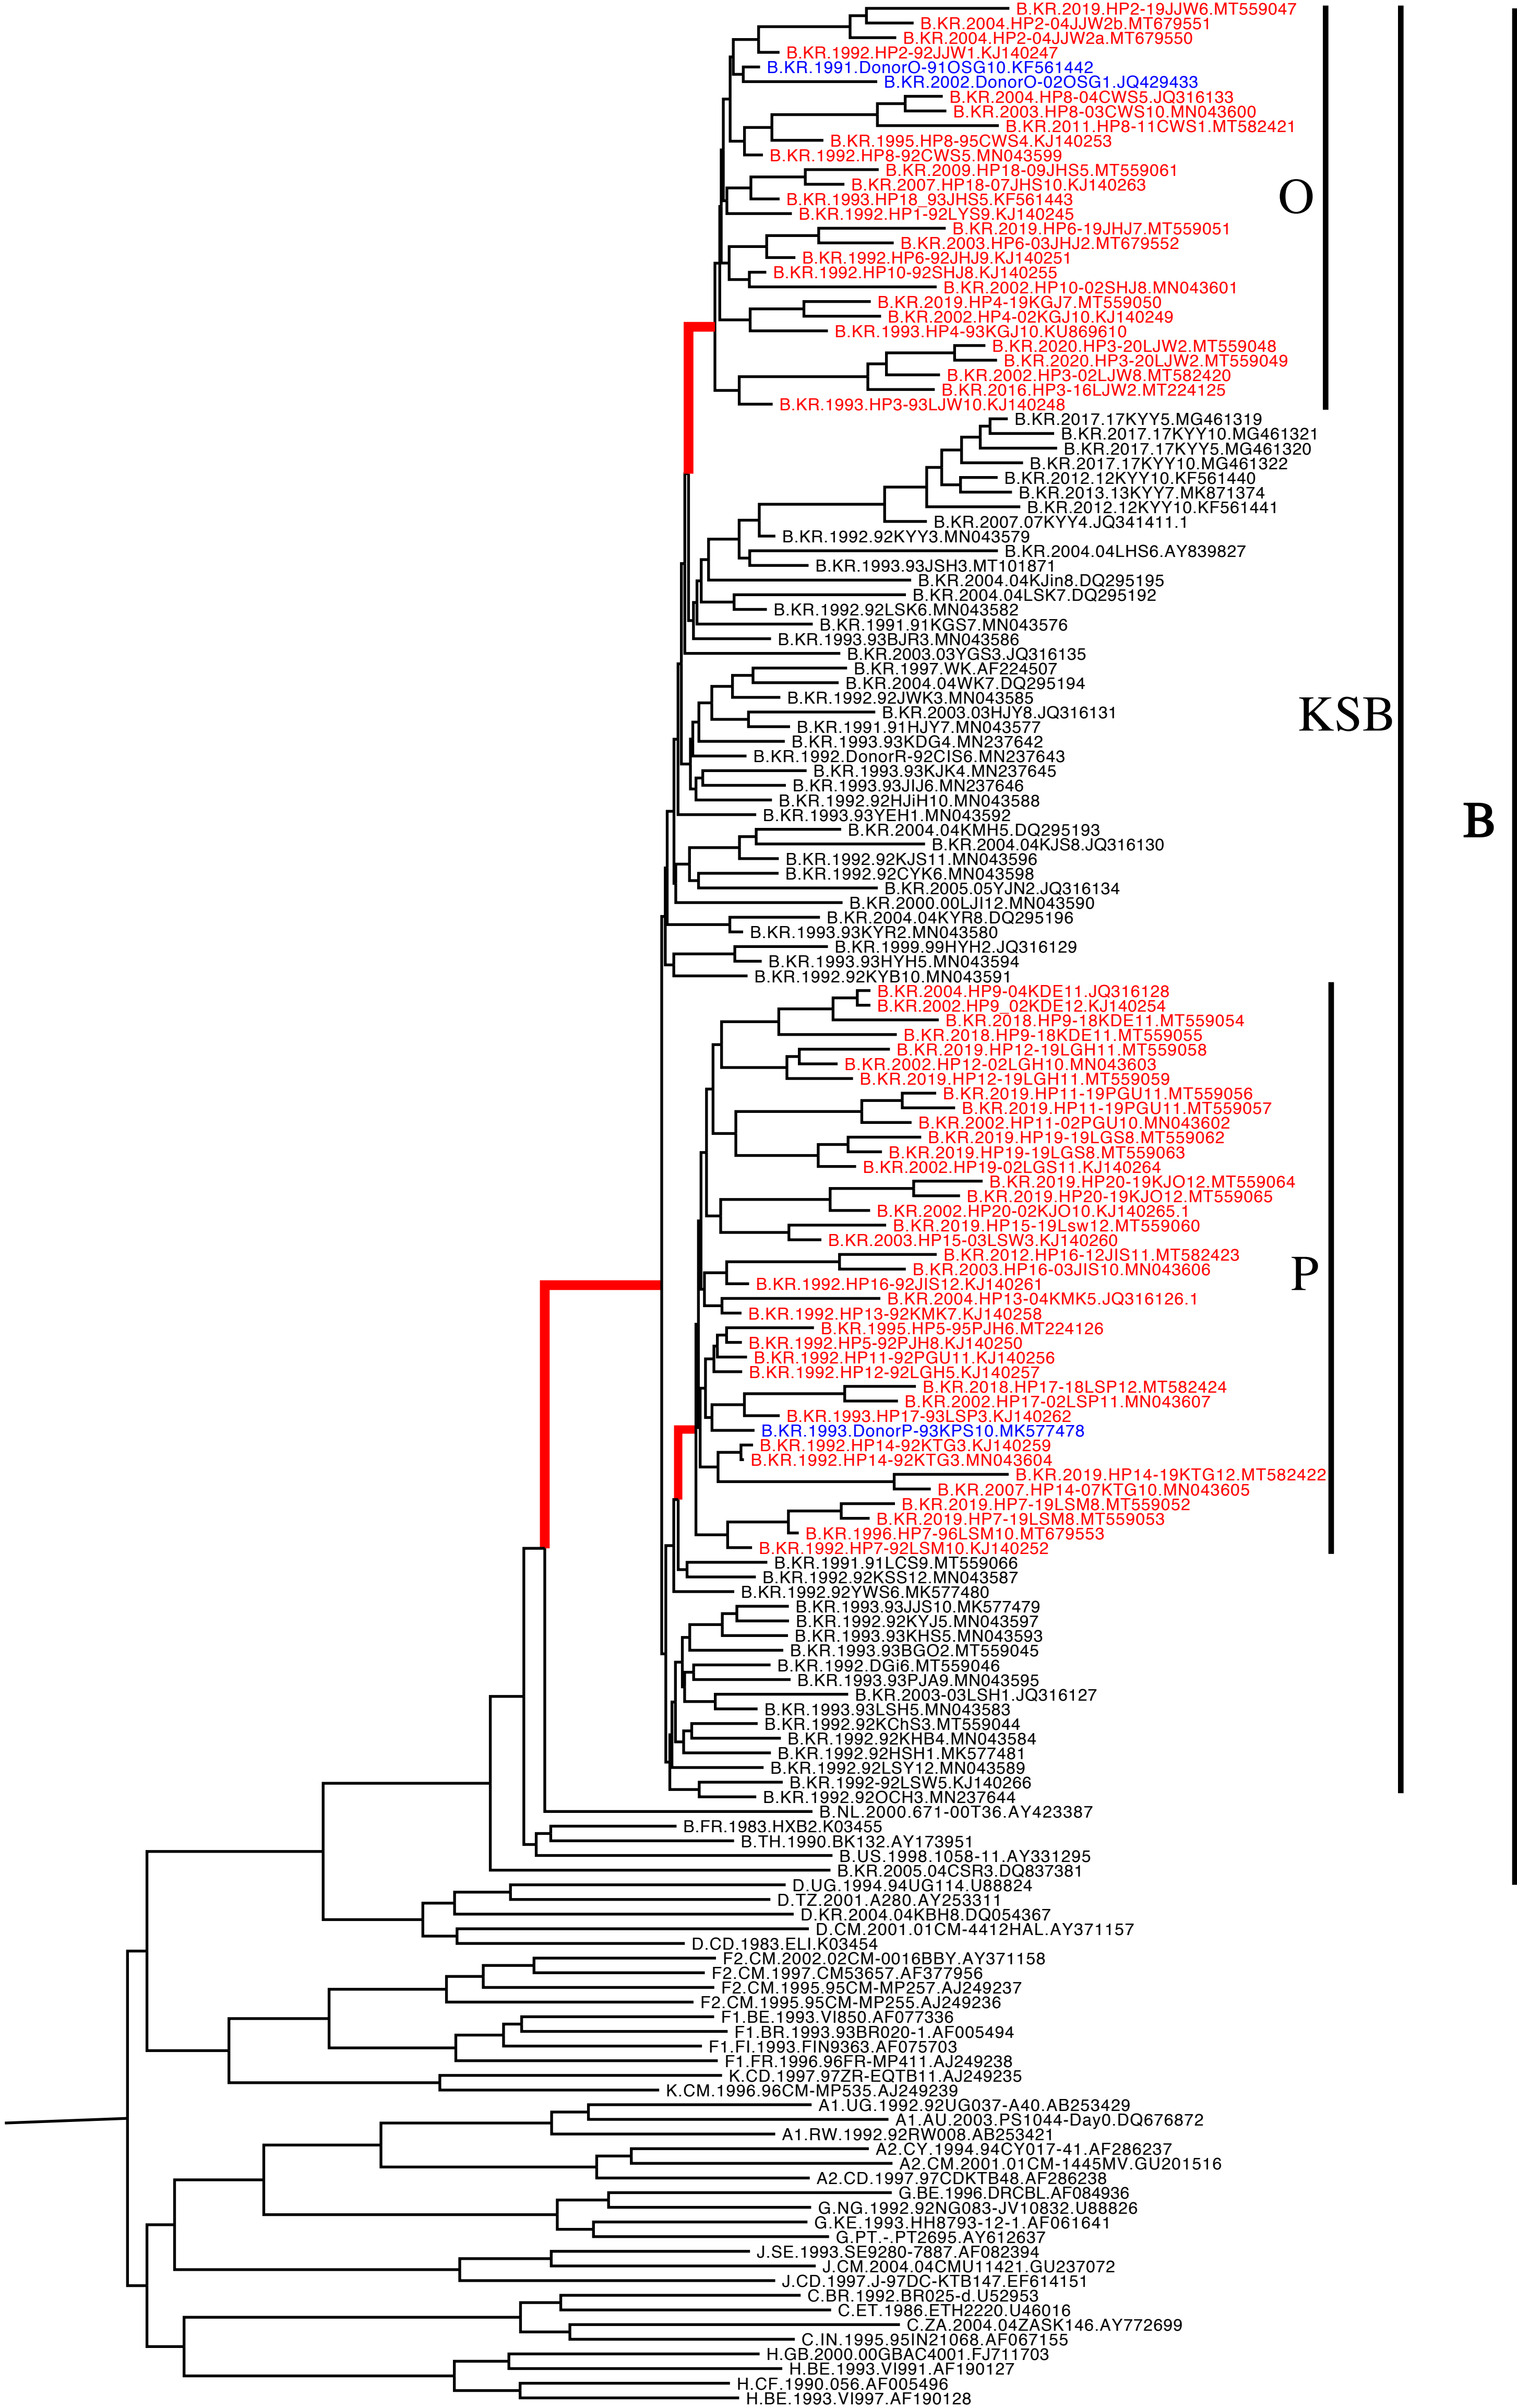

Supplement: Supplementary file 1 [file supplementary]
